# Supplementary material for: Transcriptome response to elevated atmospheric CO2 concentration in the Formosan subterranean termite, Coptotermes formosanus Shiraki (Isoptera: Rhinotermitidae)
Source: PeerJ. 2016 Oct 4;4:e2527. doi: 10.7717/peerj.2527 (PMC5068368; doi:10.7717/peerj.2527)
Supplement: Table S1 [file peerj-04-2527-s006.xlsx]

## Sheet: Sheet1
Table S1. Primers of qRT-PCR for Coptotermes formosanus used in the experiment.
Primer name	Sequence (5'-3')
18S-F	CGAGATTGAGCAATAACAGGTC
18S-R	ACGTAATCAACGCGAGCTTATG
c181311_c0-F	GCCCCAGTAACTAAAGAAGAAGC
c181311_c0-R	CCAGATTTCTTTACCTCCCTTCC
c168998_c0-F	ATTGGTCATTCAGAGCGAAGAG
c168998_c0-R	ACAACCGAATCCCATTTATCAG
c167200_c0-F	GTACGATTCAGCACATGGAGTATT
c167200_c0-R	TCTGGTCCTACCTTTGCCTTAG
c173654_c0-F	CAAGCACTGCCCAAATACGA
c173654_c0-R	CCTGGGAACCTTTGTCTGATG
c166756_c0-F	TCCCCTTGATTTCACATTTGTC
c166756_c0-R	CACCAAGATCACCAATGATTGAGT
c184494_c2-F	CGTGCTAACTTAACAACTGCTTTC
c184494_c2-R	TGTGCTTCATCCATATCCTCCT
c179746_c0-F	CACAACAGATCCCTCGCTGAA
c179746_c0-R	CTTTGATGATTGCACCACCTCTTA
c169342_c0-F	CCAGAAGCAAGAATAAGCATTTCC
c169342_c0-R	GGCATCAATCCAGCCCAGA
c125410_c0-F	CAGAACGGGTCATCAGACATTT
c125410_c0-R	CCGACTCCTCAAGACTTAGCG
c129041_c0-F	TATCGCAGACCTCGCTATGG
c129041_c0-R	TGGAGGGTCTACCTGGTCAAT
