# Supplementary material for: Transcriptome response to elevated atmospheric CO2 concentration in the Formosan subterranean termite, Coptotermes formosanus Shiraki (Isoptera: Rhinotermitidae)
Source: PeerJ. 2016 Oct 4;4:e2527. doi: 10.7717/peerj.2527 (PMC5068368; doi:10.7717/peerj.2527)
Supplement: Table S2 [file peerj-04-2527-s007.xlsx]

## Sheet: Sheet1
Table S2. Unigenes annotated in different databases.
Annotated databases	Number	< 300 bp	300 ≤ length < 1000 bp	≥ 1000 bp
NR	61,407 (32.42%)	14,929 (17.72%)	29,518 (36.41%)	16,960 (70.40%)
Swiss-Prot	35,633 (18.81%)	6,872 (8.16%)	16,184 (19.96%)	12,577 (52.20%)
GO	16,552 (8.74%)	4,192 (4.98%)	6,574 (8.11%)	5,786 (24.02%)
PFAM	32,444 (17.13%)	6,899 (8.19%)	13,744 (16.95%)	11,801 (48.98%)
COG	19,517 (10.30%)	4,568 (5.42%)	8,901 (10.98%)	6,048 (25.10%)
KOG	30,531 (16.12%)	6,240 (7.41%)	13,664 (16.85%)	10,627 (44.11%)
KEGG	16,444 (8.68%)	3,384 (4.02%)	7,573 (9.34%)	5,487 (22.78%)
All annotated	64,389 (33.99%)	16,565 (19.66%)	30,779 (37.96%)	17,045 (70.75%)
Total number	189421	84246	81081	24092
