# Supplementary material for: Transcriptome response to elevated atmospheric CO2 concentration in the Formosan subterranean termite, Coptotermes formosanus Shiraki (Isoptera: Rhinotermitidae)
Source: PeerJ. 2016 Oct 4;4:e2527. doi: 10.7717/peerj.2527 (PMC5068368; doi:10.7717/peerj.2527)
Supplement: Table S3 [file peerj-04-2527-s008.xlsx]

## Sheet: Sheet1
Table S3. Common DEGs with informative annotations in T1 vs T2, T1 vs T3, T1 vs T4.
Gene ID	T1	T2	T3	T4	T1 vs. T2	T1 vs. T3	T1 vs. T4	NR annotation
c188927_c0	0	20.3	15.08	10	up	up	up	PREDICTED: transferrin-like [Harpegnathos saltator]
c127508_c0	20.95	42.19	88.32	146.3	up	up	up	prolixicin antimicrobial protein [Coptotermes formosanus]
c191131_c0	3.65	10.42	10.72	0.39	up	up	down	PREDICTED: probable adenine permease PurP-like [Ceratitis capitata]
c185045_c1	4.79	0.26	37.68	0.25	down	up	down	Adult-specific cuticular protein ACP-20 [Zootermopsis nevadensis]
c126213_c0	7.9	0	27.79	0.26	down	up	down	Adult-specific cuticular protein ACP-20 [Zootermopsis nevadensis]
c174474_c1	1.83	0	14.89	0.18	down	up	down	structural constituent of cuticle, putative [Pediculus humanus corporis]
c190969_c1	5.44	0.42	33.24	0.55	down	up	down	PREDICTED: glycine-rich cell wall structural protein [Harpegnathos saltator]
c128561_c0	7.42	0.65	66.53	1.42	down	up	down	Cell surface glycoprotein 1 [Zootermopsis nevadensis]
c128751_c0	9.32	0.65	64.55	0.31	down	up	down	Filamentous hemagglutinin [Zootermopsis nevadensis]
c192228_c0	3.97	0.17	44.97	0.33	down	up	down	Neurofilament heavy polypeptide [Zootermopsis nevadensis]
c126015_c0	24.09	2.13	207.57	4.18	down	up	down	BAT2 domain-containing protein 1 [Zootermopsis nevadensis]
c174457_c0	29.96	1.04	191.82	3.56	down	up	down	putative serine/threonine-protein kinase kinX [Zootermopsis nevadensis]
c169178_c0	7.02	0.29	36.57	0.37	down	up	down	Retinaldehyde-binding protein 1-like protein 2 [Zootermopsis nevadensis]
c127831_c0	35.33	13.79	3.4	2.73	down	down	down	Actin cytoskeleton-regulatory complex protein PAN1 [Zootermopsis nevadensis]
c169839_c0	29.33	11.68	2.48	3.28	down	down	down	Actin cytoskeleton-regulatory complex protein PAN1 [Zootermopsis nevadensis]
c102424_c0	43.06	17.06	7.91	6.73	down	down	down	Apolipoprotein D [Zootermopsis nevadensis]
c181121_c0	45.15	17.45	4.91	1.61	down	down	down	collagen precursor [Bombyx mori]
c105250_c0	945.04	290.73	178.82	258.7	down	down	down	Cuticle protein 2 [Zootermopsis nevadensis]
c192212_c0	41.27	6.39	2.4	6.99	down	down	down	Cuticle protein 5 [Zootermopsis nevadensis]
c192110_c0	50.83	12.09	3	5.04	down	down	down	Cuticle protein 5 [Zootermopsis nevadensis]
c158489_c0	8	2.17	1.22	2.07	down	down	down	Cuticle protein 6 [Zootermopsis nevadensis]
c105613_c0	210.47	37.93	13.81	16.72	down	down	down	Cuticle protein 6 [Zootermopsis nevadensis]
c191959_c0	148.7	31.18	10.65	11.58	down	down	down	Cuticle protein 6 [Zootermopsis nevadensis]
c191975_c0	271.09	52.33	27.31	44.01	down	down	down	Cuticle protein 7 [Zootermopsis nevadensis]
c168097_c0	108.14	18	3.32	13.9	down	down	down	Cuticle protein 7 [Zootermopsis nevadensis]
c192102_c0	39.74	6.25	2.27	4.27	down	down	down	Cuticle protein 7 [Zootermopsis nevadensis]
c156786_c0	31.64	11.76	10.23	11.35	down	down	down	Cuticle protein 8 [Zootermopsis nevadensis]
c186958_c0	18.01	5.29	7.52	5.66	down	down	down	glucokinase 1 [Coptotermes formosanus]
