# Supplementary material for: Transcriptome response to elevated atmospheric CO2 concentration in the Formosan subterranean termite, Coptotermes formosanus Shiraki (Isoptera: Rhinotermitidae)
Source: PeerJ. 2016 Oct 4;4:e2527. doi: 10.7717/peerj.2527 (PMC5068368; doi:10.7717/peerj.2527)
Supplement: Table S5 [file peerj-04-2527-s010.xlsx]

## Sheet: Sheet1
Table S5. Candidate genes related to chemosensory system.
Family	Gene ID	FPKM
		T1	T2	T3	T4
Odorant receptor	c176560_c0	2.33579	1.52774	2.25373	1.72888
	c197137_c0	0.533389	0.444014	0.908207	0.607384
Gustatory receptor	c120747_c0	1.13308	0	0.57879	0
	c173838_c1	3.85751	2.38189	3.03149	3.34517
	c184569_c0	0.327438	1.05135	0.836299	1.17452
	c187210_c1	22.3537	21.1727	24.1773	23.2857
	c207317_c0	1.17951	0.25248	0.723009	0.483529
Ionotropic receptor	c88055_c0	0.524302	0.280574	0.26782	0.805998
	c186556_c2	0.928961	0.579977	1.2654	0.555362
	c206191_c0	0.222626	0.238272	0.454881	0.684478
	c238423_c0	0	0.315694	0.602688	0.302296
Chemosensory protein	c125410_c0†	8.06617	3.3204	29.5817	4.02734
	c192656_c0	9.43086	12.5555	15.5097	12.0226
Odorant binding protein	c101549_c0	9.87661	8.08348	6.97411	9.67551
	c107627_c0	8.38891	12.7307	14.3265	12.8319
	c109973_c0	12.7103	12.9684	15.4105	13.6345
	c110031_c0†	9.30461	15.2055	24.8378	19.1743
	c116625_c0	29.2194	28.4232	37.1746	41.1402
	c124272_c0	1.42093	2.36567	4.19368	2.75068
	c128738_c1†	9.9603	18.389	21.1146	17.4809
	c128814_c0†	1.9459	0.612546	3.74209	1.40772
	c129041_c0†	15.9547	30.3707	39.0028	33.9871
	c169079_c1	0.713682	1.74592	2.08319	2.19426
	c178402_c0	2.70837	3.72691	4.74333	1.78437
	c192285_c0†	7.75168	14.7492	19.7983	15.7415
	c192390_c0	31.7348	25.0562	25.9103	28.1249
	c192401_c0	6.4204	9.58408	14.8446	11.6015
	c192419_c0	11.2707	19.602	23.3487	20.8556
	c192552_c0	9.04083	12.0118	17.6764	13.2593
	c192747_c0	11.7764	10.8034	12.604	13.6017
	c192783_c0†	3.57731	6.34472	10.0242	5.65644
	c193075_c0	5.50714	5.03161	7.41017	7.0206
	c193269_c0†	0.885315	3.60062	5.60765	3.81073
	c86973_c0	1.22383	1.04787	1.50036	0.752549
	c99658_c0	4.89409	7.2877	9.1303	6.54225
† Differential expressed genes among libraries.
